# Supplementary material for: Supported CuBr on graphene oxide/Fe3O4: a highly efficient, magnetically separable catalyst for the multi-gram scale synthesis of 1,2,3-triazoles
Source: Royal Society of Chemistry journal article supplement (doi:10.1039/c3ra45994b), 2014-01-01
Supplement: c3ra45994b.pdf [file c3ra45994b.pdf]

**Supported CuBr on graphene oxide/Fe<sub>3</sub>O<sub>4</sub>: a highly efficient, magnetically separable catalyst for the multi-gram scale synthesis of 1,2,3-triazoles**

Xingquan Xiong\*, Huixin Chen, Zhongke Tang, and Yunbing Jiang

College of Materials Science & Engineering, Huaqiao University, Xiamen 361021, China

**(1) 2-((1-benzyl-1*H*-1,2,3-triazol-4-yl)methoxy)benzoate**

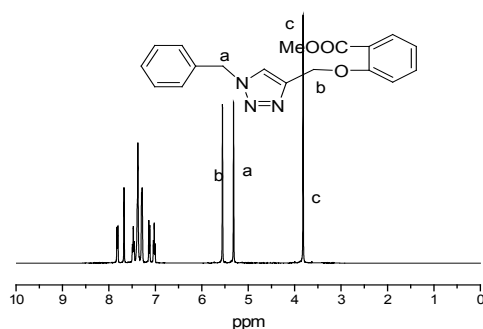

**Fig. S1** <sup>1</sup>H NMR spectrum of methyl 2-((1-benzyl-1*H*-1,2,3-triazol-4-yl)methoxy)benzoate

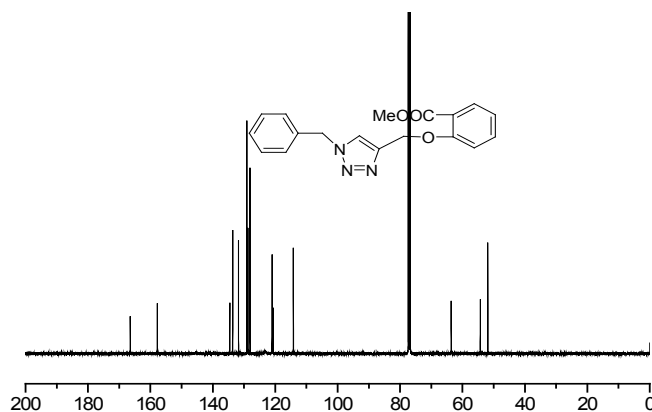

**Fig. S2** <sup>13</sup>C NMR spectrum of methyl 2-((1-benzyl-1*H*-1,2,3-triazol-4-yl)methoxy)benzoate

**(2) 4-((2-isopropyl-5-methylphenoxy)methyl)-1-benzyl-1*H*-1,2,3-triazole**

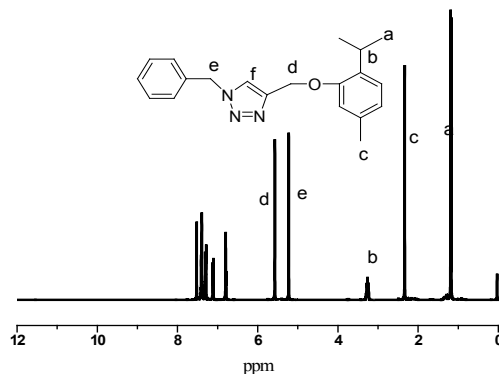

**Fig. S3** <sup>1</sup>H NMR spectrum of 4-((2-isopropyl-5-methylphenoxy)methyl)-1-benzyl-1*H*-1,2,3-

triazole

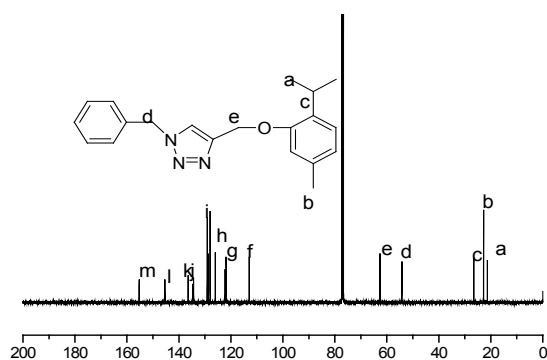

**Fig. S4** <sup>13</sup>C NMR spectrum of 4-((2-isopropyl-5-methylphenoxy)methyl)-1-benzyl-1H-1,2,3-triazole

**(3) 4-((4-((1-benzyl-1H-1,2,3-triazol-4-yl)methoxy)phenoxy)methyl)-1-benzyl-1H-1,2,3-triazole**

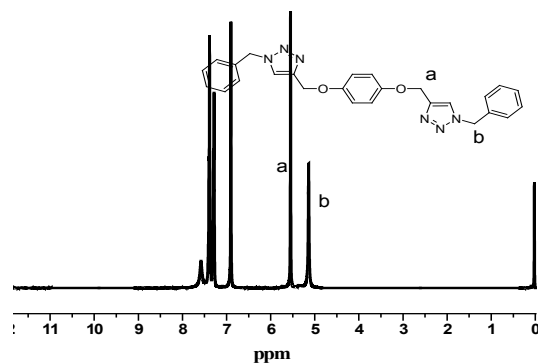

**Fig. S5** <sup>1</sup>H NMR spectrum of 4-((4-((1-benzyl-1H-1,2,3-triazol-4-yl)methoxy)phenoxy)methyl)-1-benzyl-1H-1,2,3-triazole

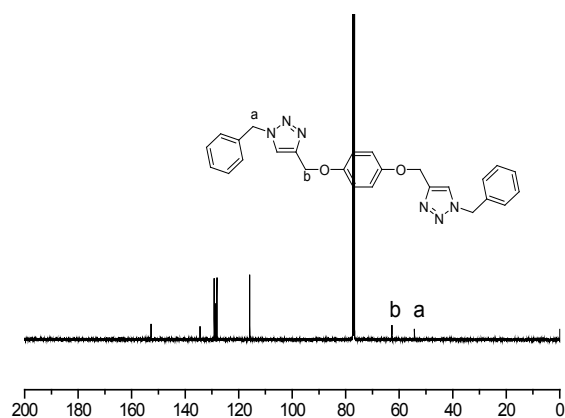

**Fig. S6** <sup>13</sup>C NMR spectrum of 4-((4-((1-benzyl-1H-1,2,3-triazol-4-yl)methoxy)phenoxy)methyl)-1-benzyl-1H-1,2,3-triazole

**(4)**

**4-((4-((1-butyl-1H-1,2,3-triazol-4-yl)methoxy)phenoxy)methyl)-1-butyl-1H-1,2,3-**

## triazole

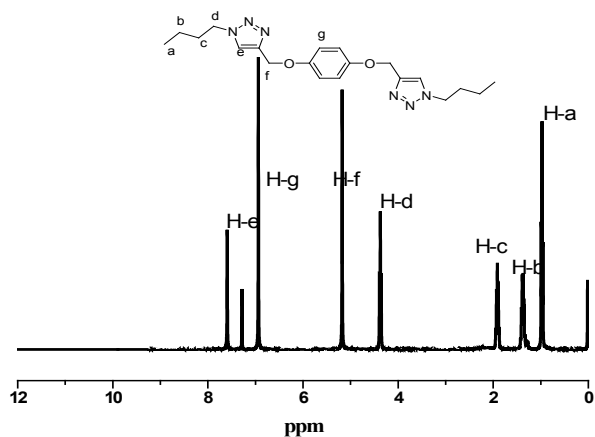

**Fig. S7** <sup>1</sup>H NMR spectrum of 4-((4-((1-butyl-1H-1,2,3-triazol-4-yl)methoxy)phenoxy)methyl)-1-butyl-1H-1,2,3-triazole

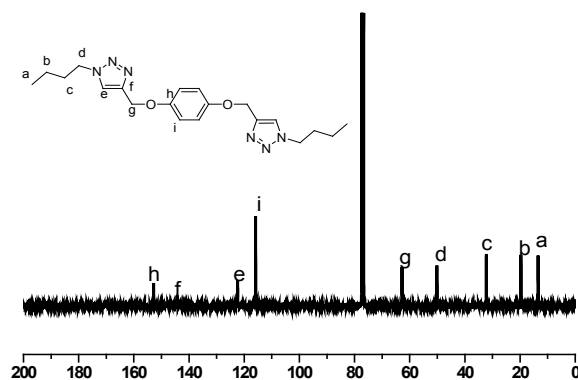

**Fig. S8** <sup>13</sup>C NMR spectrum of 4-((4-((1-butyl-1H-1,2,3-triazol-4-yl)methoxy)phenoxy)methyl)-1-butyl-1H-1,2,3-triazole

## (5) 4-((3-((1-benzyl-1H-1,2,3-triazol-4-yl)methoxy)phenoxy)methyl)-1-benzyl-1H-1,2,3-triazole

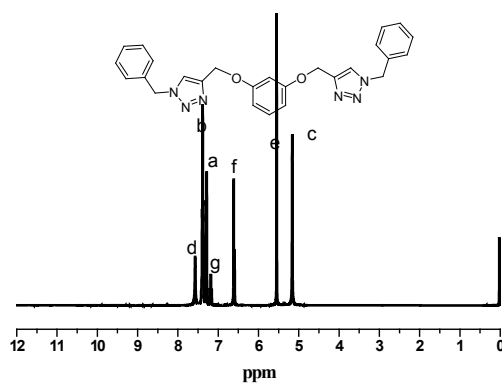

**Fig. S9** <sup>1</sup>H NMR spectrum of 4-((3-((1-benzyl-1H-1,2,3-triazol-4-yl)methoxy)phenoxy)methyl)-1-benzyl-1H-1,2,3-triazole

-1-benzyl-1*H*-1,2,3-triazole

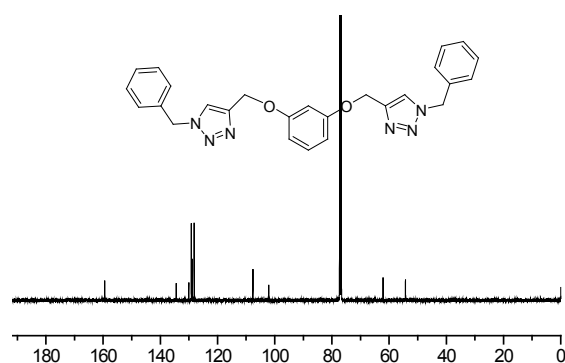

**Fig. S10** <sup>13</sup>C NMR spectrum of 4-((3-((1-benzyl-1*H*-1,2,3-triazol-4-yl)methoxy)phenoxy)methyl)-1-benzyl-1*H*-1,2,3-triazole

**(6) Methyl 3,5-bis((1-benzyl-1*H*-1,2,3-triazol-4-yl) methoxy) benzoate**

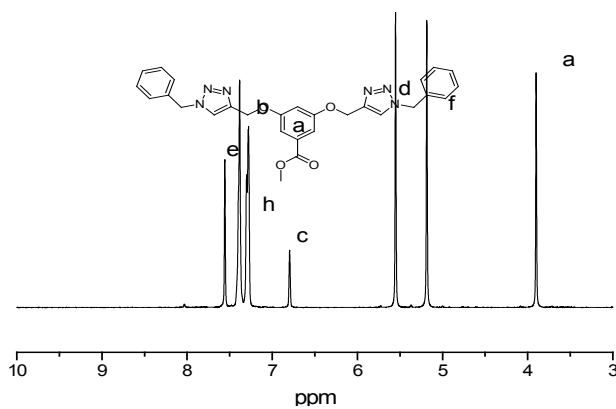

**Fig. S11** <sup>1</sup>H NMR spectrum of Methyl 3,5-bis((1-benzyl-1*H*-1,2,3-triazol-4-yl) methoxy) benzoate

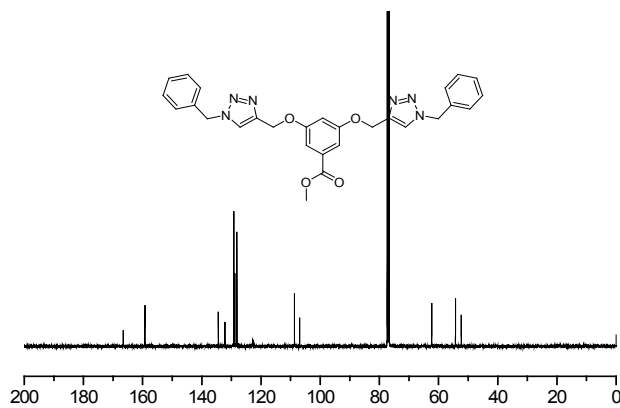

**Fig. S12** <sup>13</sup>C NMR spectrum of Methyl 3,5-bis((1-benzyl-1*H*-1,2,3-triazol-4-yl) methoxy) benzoate

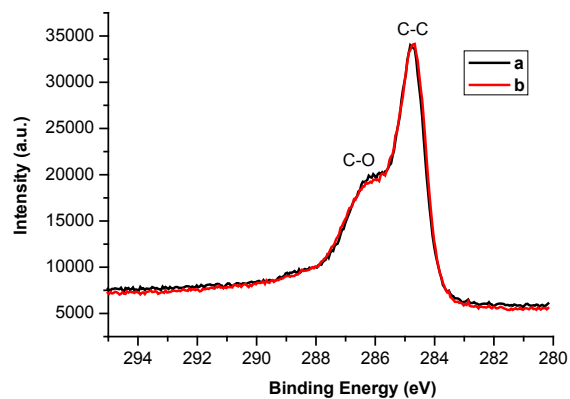

**Fig. S13** XPS C1s spectra of GO/Fe<sub>3</sub>O<sub>4</sub>-CuBr (a) and GO/Fe<sub>3</sub>O<sub>4</sub>-CuBr after 6 recycling (b)

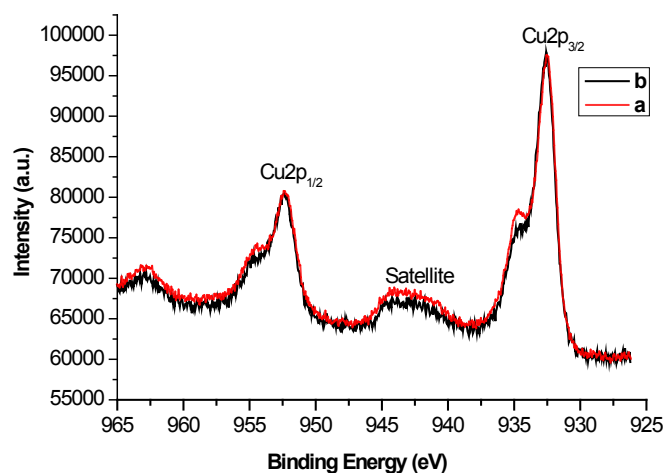

**Fig. S14** XPS Cu2p spectrum of GO/Fe<sub>3</sub>O<sub>4</sub>-CuBr (a) and GO/Fe<sub>3</sub>O<sub>4</sub>-CuBr after 6 recycling (b)

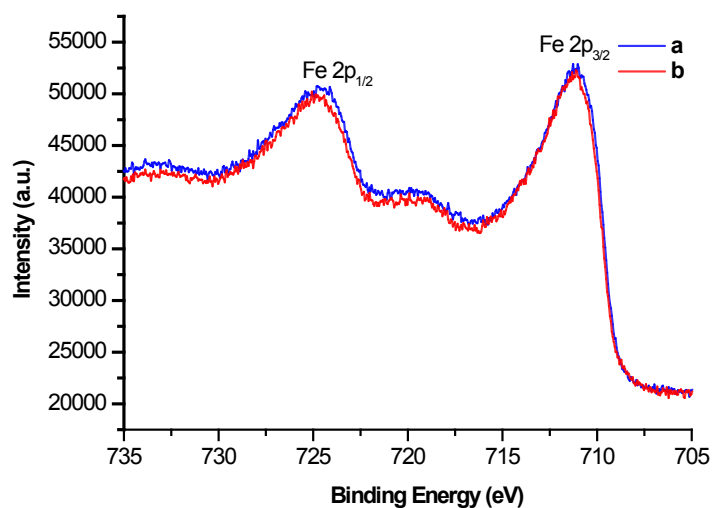

**Fig. S15** XPS Fe2p spectrum of GO/Fe<sub>3</sub>O<sub>4</sub>-CuBr (a) and GO/Fe<sub>3</sub>O<sub>4</sub>-CuBr after 6 recycling (b)
